# Supplementary material for: iGenomics: Comprehensive DNA sequence analysis on your Smartphone
Source: PubMed Central journal article supplement (PMC7720420; doi:10.1093/gigascience/giaa138), 2020-12-07
Supplement: giaa138_response_to_reviewer_comments_original_submission.pdf [file giaa138_response_to_reviewer_comments_original_submission.pdf]

# Author's Response To Reviewer Comments

Close

Please see the response letter PDF file.

Close
