# Supplementary material for: iGenomics: Comprehensive DNA sequence analysis on your Smartphone
Source: PubMed Central journal article supplement (PMC7720420; doi:10.1093/gigascience/giaa138), 2020-12-07
Supplement: giaa138_response_to_reviewer_comments_revision_1.pdf [file giaa138_response_to_reviewer_comments_revision_1.pdf]

## Author's Response To Reviewer Comments

Close

We have added the Software Availability and Data Availability sections as requested. -MCS

Close
